# Supplementary material
Source: PubMed Central journal article supplement (PMC7521649)
Supplement: supp_RA119.011164_155977_2_supp_574026_qmc6q9.pdf [file supp_RA119.011164_155977_2_supp_574026_qmc6q9.pdf]

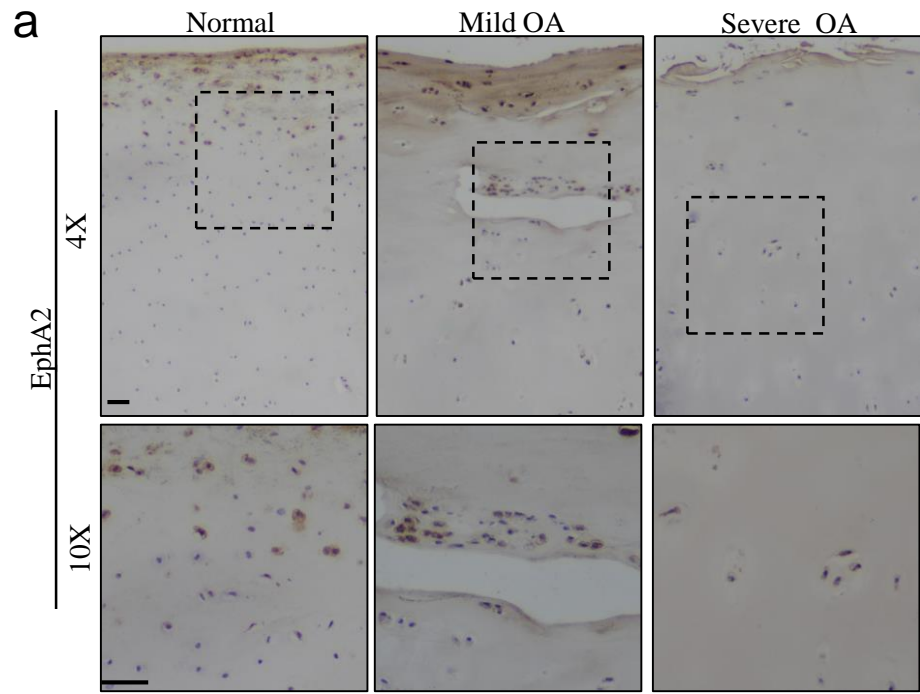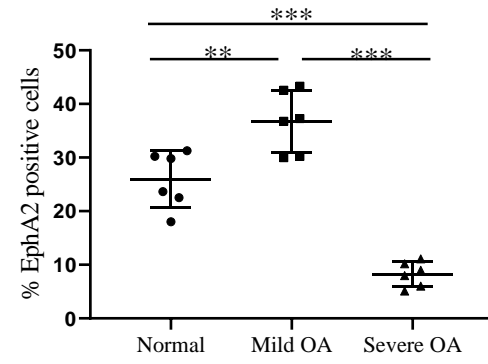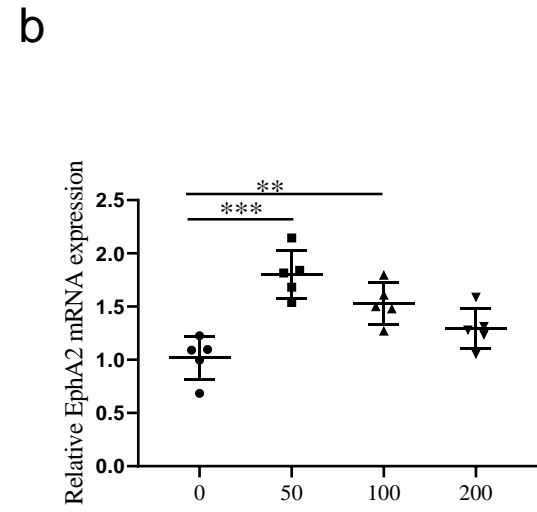

**Supplemental figure 1**

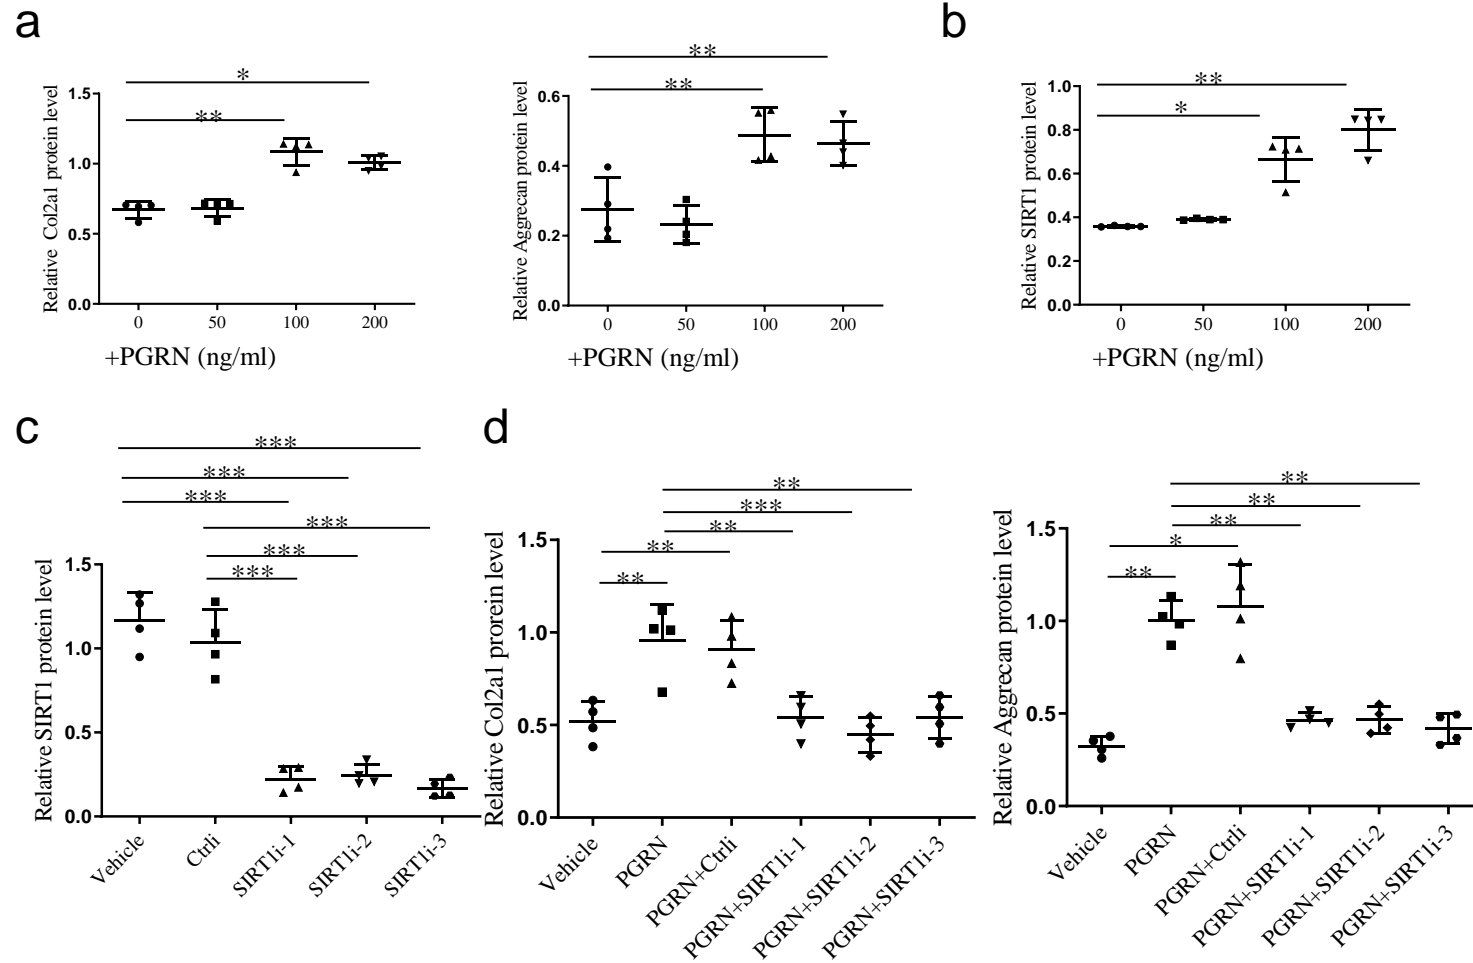

**Supplemental figure 2**

**a**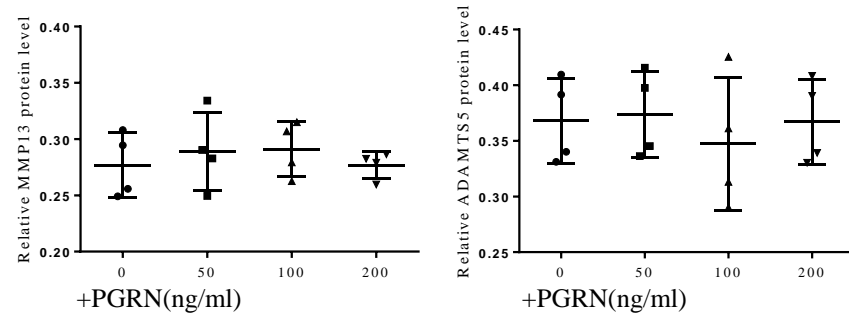**b**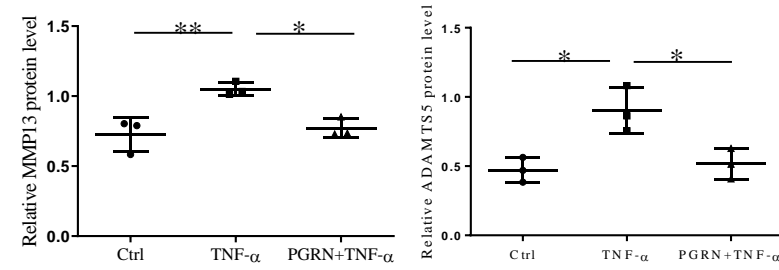**c**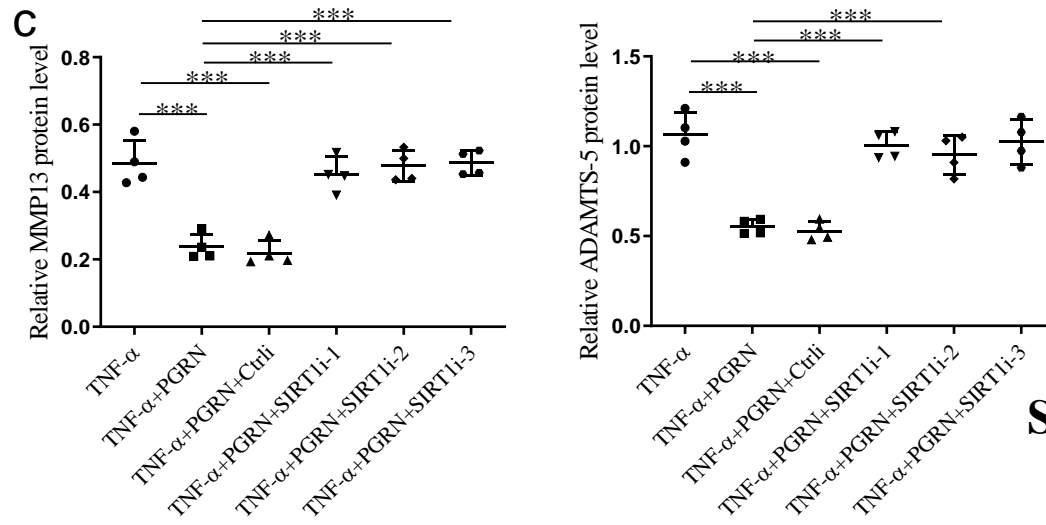**Supplemental figure 3**

a

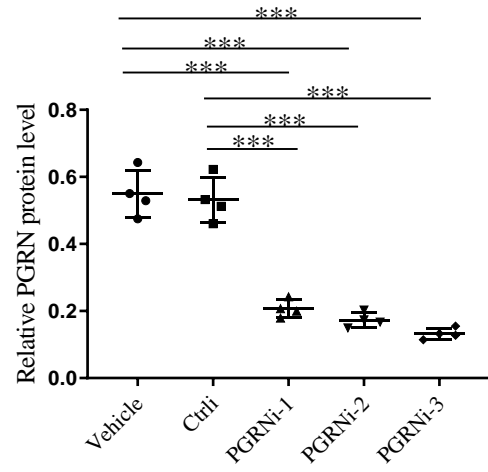

b

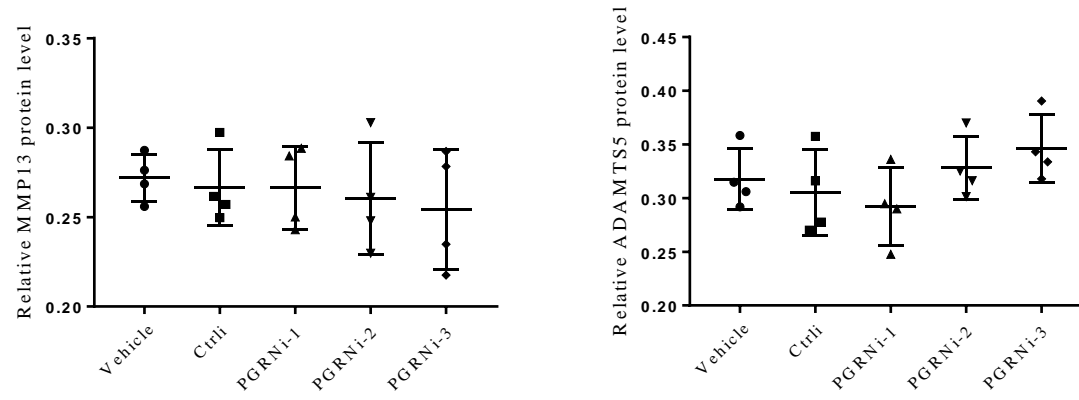

**Supplemental figure 4**

Progranulin modulates cartilage-specific gene expression via SIRT1-mediated deacetylation of Sox9 and p65

Dongxu Feng, Xiaomin Kang, Ruiqi Wang, He Chen, Kun Zhang, Weilou Feng, Huixia Li, Yangjun Zhu and Shufang Wu

**SUPPLEMENTAL FIGURE LEGENDS**

**Supplemental Figure 1 EphA2 expression in human articular cartilage and chondrocytes treated with PGRN.**

*A*, Immunohistochemistry and statistical analyses of EphA2 expression in articular cartilage from normal humans and OA patients (n=6/group). Scale bar, 50 $\mu$ m. One-way ANOVA and Tukey's multiple comparison test. *B*, Chondrocytes were cultured in the presence of graded concentrations of recombinant PGRN(0-200ng/ml) for 48 h. EphA2 mRNA level was examined by real-time PCR. One-way ANOVA and Dunnett's multiple comparison test.

**Supplemental Figure 2**

*A-D*, Quantification of figure 2E, 2F, 2I and 2O were shown on panel A-D, respectively. Data are expressed as means  $\pm$  S.D. in each scatter plot. \* $P$ <0.05, \*\* $P$ <0.01, \*\*\* $P$ <0.001. A-B One-way ANOVA and Dunnett's multiple comparison test. C-D, One-way ANOVA and Tukey's multiple comparison test.

**Supplemental Figure 3**

*A-C*, Quantification of figure 4A, 4F, 4H were shown on panel A-C, respectively. Data are expressed as means  $\pm$  S.D. in each scatter plot. \* $P$ <0.05, \*\* $P$ <0.01, \*\*\* $P$ <0.001. One-way ANOVA and Tukey's multiple comparison test.

**Supplemental Figure 4**

*A-B*, Quantification of figure 6A and 6H were shown on panel A-B, respectively. Data are expressed as means  $\pm$  S.D. in each scatter plot. \* $P$ <0.05, \*\* $P$ <0.01, \*\*\* $P$ <0.001. One-way ANOVA and Tukey's multiple comparison test.
